# Supplementary material for: Tuberculosis in people newly diagnosed with HIV at a large HIV care and treatment center in Northwest Cameroon: Burden, comparative screening and diagnostic yields, and patient outcomes
Source: PubMed Central journal article supplement (PMC6019259; doi:10.1371/journal.pone.0199634), 2018-06-26
Supplement: pone.0199634.s001.pdf [file pone.0199634.s001.pdf]

**Table A. Sensitivity by type of diagnostic method and specimen among 131 people newly diagnosed with HIV with culture-confirmed TB**

| Diagnostic method  | 1st sputum specimen<br>n=131 |             | 2nd sputum specimen*<br>n=123 |             | Combined- 1st+2nd specimens<br>n=131 |             |
|--------------------|------------------------------|-------------|-------------------------------|-------------|--------------------------------------|-------------|
|                    | %                            | 95% CI      | %                             | 95% CI      | %                                    | 95% CI      |
| Direct smear       | 18.3                         | (12.6-25.8) | 22.8                          | (16.2-30.9) | 24.4                                 | (17.9-32.4) |
| Concentrated smear | 29.8                         | (22.6-38.1) | 34.1                          | (26.4-42.9) | 35.1                                 | (27.5-43.6) |
| Solid culture      | 69.5                         | (61.1-76.7) | 65.0                          | (56.3-72.9) | 80.9                                 | (73.3-86.7) |
| Liquid culture     | 78.6                         | (70.8-84.8) | 83.7                          | (76.2-89.2) | 97.7                                 | (93.5-99.2) |
| Either culture     | 84.0                         | (76.7-89.3) | 86.2                          | (79.0-91.2) | Reference                            |             |

*\*8 people (6%) had only one sputum specimen submitted.*

**Table B. Comparison of TB diagnostic results by Xpert grade, microscopy result, and type of microscopy for 108 people newly diagnosed with HIV with an Xpert result and culture-confirmed TB**

| Xpert MTB/RIF result          | Microscopy results |          |                    |          |
|-------------------------------|--------------------|----------|--------------------|----------|
|                               | Direct smear       |          | Concentrated smear |          |
|                               | Positive           | Negative | Positive           | Negative |
| MTB not detected (n=35)       | 0                  | 35       | 1                  | 34       |
| MTB detected, very low (n=20) | 2                  | 18       | 3                  | 17       |
| MTB detected, low (n=27)      | 2                  | 25       | 10                 | 17       |
| MTB detected, medium (n=19)   | 16                 | 3        | 18                 | 1        |
| MTB detected, high (n=7)      | 7                  | 0        | 7                  | 0        |
| Total (n=108)                 | 27                 | 81       | 39                 | 69       |
